# Supplementary material for: Synthesis, characterization and photovoltaic properties of benzo[1,2-b:4,5-b′]dithiophene-bridged molecules
Source: Royal Society of Chemistry journal article supplement (doi:10.1039/c4ra10081f), 2014-01-01
Supplement: c4ra10081f1.pdf [file c4ra10081f1.pdf]

## **Electronic Supplementary Information**

### **Synthesis, characterization and photovoltaic properties of benzo[1,2-*b*:4,5-*b'*]dithiophene-bridged molecules**

**Xinli Liu, Shusheng Li, Jinhua Li, Jian Wang, Zhan'ao Tan,\* Feng  
Yan, Hua Li, Yih-Hsing Lo,\* Chung-Hin Chui and Wai-Yeung Wong\***

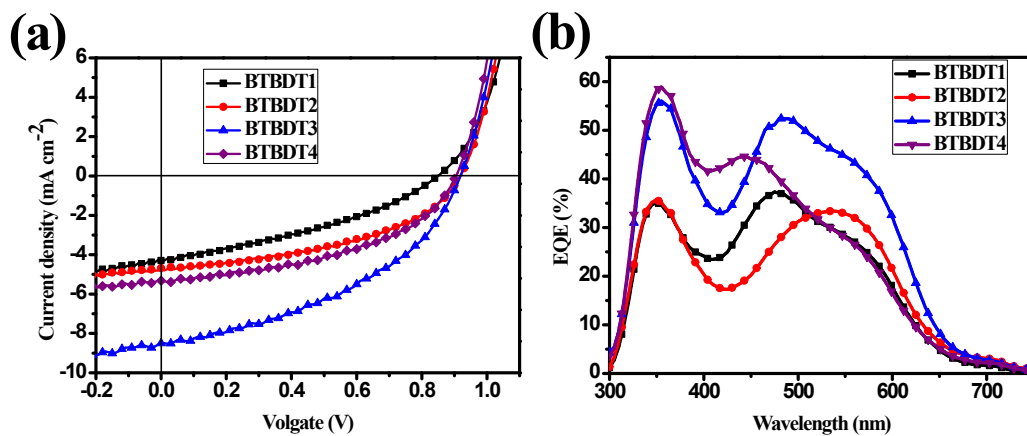

**Fig. S1** (a) Current–density ( $J$ – $V$ ) curves and (b) EQE spectra of the OSC devices with the blend ratio of **BTBDT1–BTBDT4**/ $\text{PC}_{61}\text{BM}$  = 1:3 (w/w) under the illumination of AM 1.5G,  $100 \text{ mW cm}^{-2}$ .

**Table S1** Photovoltaic properties of the OSCs based on donor/PC<sub>61</sub>BM (different ratio, w/w) under illumination of AM 1.5G, 100 mW cm<sup>-2</sup>.

| Donor  | Donor : PC <sub>61</sub> BM<br>(w/w) | $V_{oc}$ (V) | $J_{sc}$ (mA cm <sup>-2</sup> ) | FF   | PCE (%) |
|--------|--------------------------------------|--------------|---------------------------------|------|---------|
| BTBDT1 | 1 : 2                                | 0.88         | 3.57                            | 37.9 | 1.19    |
|        | 1 : 3                                | 0.85         | 4.29                            | 35.6 | 1.30    |
|        | 1 : 4                                | 0.81         | 3.01                            | 35.7 | 0.87    |
| BTBDT2 | 1 : 2                                | 0.92         | 4.61                            | 41.8 | 1.78    |
|        | 1 : 3                                | 0.92         | 4.68                            | 45.9 | 1.98    |
|        | 1 : 4                                | 0.90         | 4.85                            | 42.6 | 1.86    |
| BTBDT3 | 1 : 2                                | 0.95         | 5.50                            | 36.2 | 1.89    |
|        | 1 : 3                                | 0.92         | 8.50                            | 42.6 | 3.33    |
|        | 1 : 4                                | 0.91         | 5.88                            | 46.6 | 2.49    |
| BTBDT4 | 1 : 2                                | 0.88         | 5.38                            | 40.8 | 1.93    |
|        | 1 : 3                                | 0.90         | 5.32                            | 46.8 | 2.24    |
|        | 1 : 4                                | 0.73         | 3.94                            | 34.6 | 0.99    |

**Table S2** HOMO-1, HOMO, LUMO and LUMO+1 energy levels and  $E_g$  as determined by theoretical calculations for **BTBDT1–BTBDT4**.

|               | <b>HOMO-1<br/>(eV)</b> | <b>HOMO<br/>(eV)</b> | <b>LUMO<br/>(eV)</b> | <b>LUMO+1<br/>(eV)</b> | <b><math>E_g</math> (eV)</b> |
|---------------|------------------------|----------------------|----------------------|------------------------|------------------------------|
| <b>BTBDT1</b> | -5.57                  | -4.98                | -3.09                | -2.89                  | 1.89                         |
| <b>BTBDT2</b> | -4.88                  | -4.69                | -2.85                | -2.66                  | 1.70                         |
| <b>BTBDT3</b> | -4.97                  | -4.74                | -2.92                | -2.75                  | 1.82                         |
| <b>BTBDT4</b> | -4.86                  | -4.73                | -2.88                | -2.79                  | 1.85                         |

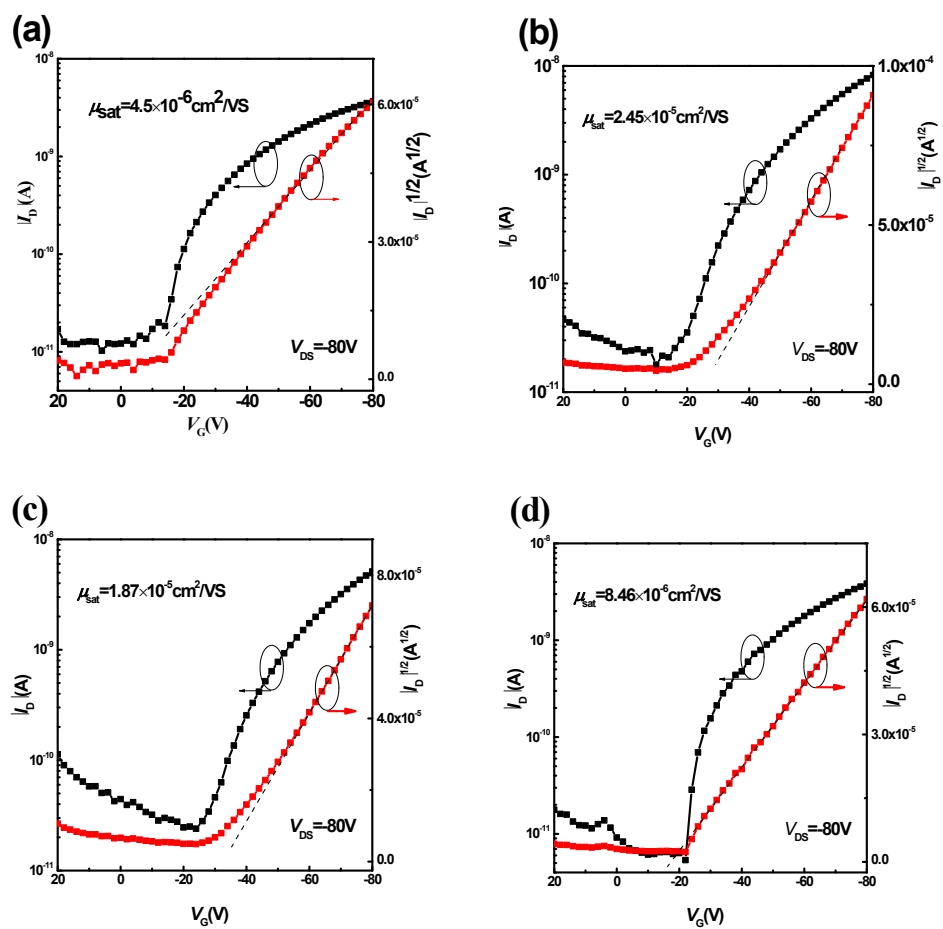

**Fig. S2** Transfer characteristics at  $V_{DS} = -80$  V from (a) BTBDT1, (b) BTBDT2, (c) BTBDT3 and (d) BTBDT4.

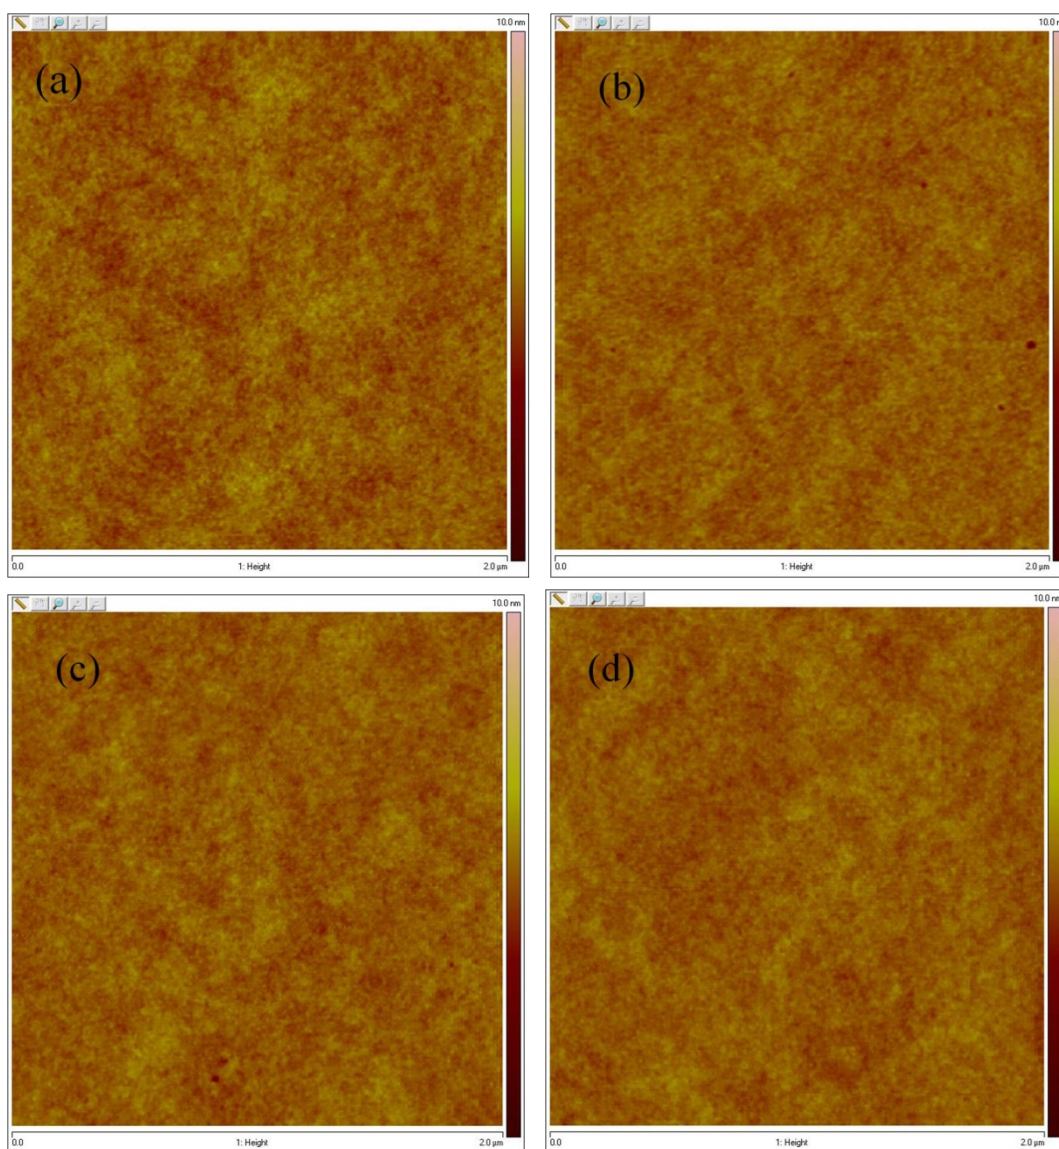

**Fig. S3** Topography images obtained by tapping mode AFM of the blend films spin-coated from chloroform solutions of **BTBDT1–BTBDT4**:PC<sub>71</sub>BM in a weight ratio of 1:2: (a) **BTBDT1**/PC<sub>71</sub>BM, (b) **BTBDT2**/PC<sub>71</sub>BM, (c) **BTBDT3**/PC<sub>71</sub>BM and (d) **BTBDT4**/PC<sub>71</sub>BM.
